# Supplementary material
Source: PubMed Central journal article supplement (PMC6440826)
Supplement: NIHMS1522270-supplement-8.pdf [file NIHMS1522270-supplement-8.pdf]

| Resting-State                                                                                                                                  |       |                                                                     |       |
|------------------------------------------------------------------------------------------------------------------------------------------------|-------|---------------------------------------------------------------------|-------|
| DMN and TPN regions in the Brainnetome ROI atlas from Fan et al. 2016 and their correlation between the resting-state and task-performing QPPs |       |                                                                     |       |
| Left Hemisphere                                                                                                                                |       | Right Hemisphere                                                    |       |
| inferior parietal lobule, part 5 (rostromedial area 39)                                                                                        | 0.96  | inferior parietal lobule, part 5 (rostromedial area 39)             | 0.92  |
| inferior parietal lobule, part 6 (rostromedial area 40)                                                                                        | -0.88 | inferior parietal lobule, part 6 (rostromedial area 40)             | -0.89 |
| precuneus, part 1 (medial area 7)                                                                                                              | -0.53 | precuneus, part 1 (medial area 7)                                   | -0.63 |
| precuneus, part 2 (medial area 5)                                                                                                              | -0.94 | precuneus, part 2 (medial area 5)                                   | -0.87 |
| precuneus, part 3 (dorsomedial parietooccipital sulcus)                                                                                        | -0.65 | precuneus, part 3 (dorsomedial parietooccipital sulcus)             | 0.61  |
| precuneus, part 4 (area 31)                                                                                                                    | 0.98  | precuneus, part 4 (area 31)                                         | 0.98  |
| postcentral gyrus, part 1 (area 1/2/3 upper limb)                                                                                              | -0.93 | postcentral gyrus, part 1 (area 1/2/3 upper limb)                   | -0.54 |
| postcentral gyrus, part 2 (area 1/2/3 tongue and larynx)                                                                                       | -0.93 | postcentral gyrus, part 2 (area 1/2/3 tongue and larynx)            | -0.94 |
| postcentral gyrus, part 3 (area 2)                                                                                                             | -0.92 | postcentral gyrus, part 3 (area 2)                                  | -0.69 |
| postcentral gyrus, part 4 (area 1/2/3 trunk)                                                                                                   | -0.94 | postcentral gyrus, part 4 (area 1/2/3 trunk)                        | -0.89 |
| insular, part 1 (hypergranular insula)                                                                                                         | -0.87 | insular, part 1 (hypergranular insula)                              | -0.86 |
| insular, part 2 (ventral agranular insula)                                                                                                     | 0.82  | insular, part 2 (ventral agranular insula)                          | 0.82  |
| insular, part 3 (dorsal agranular insula)                                                                                                      | 0.79  | insular, part 3 (dorsal agranular insula)                           | 0.09  |
| insular, part 4 (ventral granular insula)                                                                                                      | -0.82 | insular, part 4 (ventral granular insula)                           | -0.57 |
| insular, part 5 (dorsal granular insula)                                                                                                       | -0.92 | insular, part 5 (dorsal granular insula)                            | -0.88 |
| insular, part 6 (dorsal dysgranular insula)                                                                                                    | -0.75 | insular, part 6 (dorsal dysgranular insula)                         | -0.71 |
| cingulate gyrus, part 1 (dorsal area 23)                                                                                                       | 0.94  | cingulate gyrus, part 1 (dorsal area 23)                            | 0.93  |
| cingulate gyrus, part 2 (rostromedial area 24)                                                                                                 | 0.52  | cingulate gyrus, part 2 (rostromedial area 24)                      | 0.94  |
| cingulate gyrus, part 3 (pregenual area 32)                                                                                                    | 0.87  | cingulate gyrus, part 3 (pregenual area 32)                         | 0.42  |
| cingulate gyrus, part 4 (ventral area 23)                                                                                                      | 0.57  | cingulate gyrus, part 4 (ventral area 23)                           | 0.84  |
| cingulate gyrus, part 5 (caudodorsal area 24)                                                                                                  | -0.54 | cingulate gyrus, part 5 (caudodorsal area 24)                       | 0.18  |
| cingulate gyrus, part 6 (caudal area 24)                                                                                                       | -0.85 | cingulate gyrus, part 6 (caudal area 24)                            | -0.93 |
| cingulate gyrus, part 7 (subgenual area 32)                                                                                                    | 0.99  | cingulate gyrus, part 7 (subgenual area 32)                         | 0.98  |
| cuneus, part 1 (caudal lingual gyrus)                                                                                                          | 0.99  | cuneus, part 1 (caudal lingual gyrus)                               | 0.97  |
| cuneus, part 2 (rostral cuneus gyrus)                                                                                                          | 0.69  | cuneus, part 2 (rostral cuneus gyrus)                               | 0.34  |
| cuneus, part 3 (caudal cuneus gyrus)                                                                                                           | 0.98  | cuneus, part 3 (caudal cuneus gyrus)                                | 0.84  |
| cuneus, part 4 (rostral lingual gyrus)                                                                                                         | 0.90  | cuneus, part 4 (rostral lingual gyrus)                              | 0.54  |
| cuneus, part 5 (ventromedial parietooccipital sulcus)                                                                                          | 0.03  | cuneus, part 5 (ventromedial parietooccipital sulcus)               | -0.73 |
| occipital gyrus, part 1 (middle occipital gyrus)                                                                                               | 0.97  | occipital gyrus, part 1 (middle occipital gyrus)                    | 0.95  |
| occipital gyrus, part 2 (area V5/MT)                                                                                                           | 0.91  | occipital gyrus, part 2 (area V5/MT)                                | 0.94  |
| occipital gyrus, part 3 (occipital polar cortex)                                                                                               | 0.80  | occipital gyrus, part 3 (occipital polar cortex)                    | 1.00  |
| occipital gyrus, part 4 (inferior occipital gyrus)                                                                                             | 0.92  | occipital gyrus, part 4 (inferior occipital gyrus)                  | 0.97  |
| superior occipital gyrus, part 1 (medial superior occipital gyrus)                                                                             | 0.35  | superior occipital gyrus, part 1 (medial superior occipital gyrus)  | 0.59  |
| superior occipital gyrus, part 2 (lateral superior occipital gyrus)                                                                            | 0.83  | superior occipital gyrus, part 2 (lateral superior occipital gyrus) | 0.61  |
| amygdala, part 1 (medial amygdala)                                                                                                             | 0.65  | amygdala, part 1 (medial amygdala)                                  | 0.81  |
| amygdala, part 2 (lateral amygdala)                                                                                                            | 0.07  | amygdala, part 2 (lateral amygdala)                                 | 0.72  |

| Task-Performing                                                                                                                                |       |                                                                     |       |
|------------------------------------------------------------------------------------------------------------------------------------------------|-------|---------------------------------------------------------------------|-------|
| DMN and TPN regions in the Brainnetome ROI atlas from Fan et al. 2016 and their correlation between the resting-state and task-performing QPPs |       |                                                                     |       |
| Left Hemisphere                                                                                                                                |       | Right Hemisphere                                                    |       |
| inferior parietal lobule, part 5 (rostromedial area 39)                                                                                        | 0.96  | inferior parietal lobule, part 5 (rostromedial area 39)             | 0.92  |
| inferior parietal lobule, part 6 (rostromedial area 40)                                                                                        | -0.88 | inferior parietal lobule, part 6 (rostromedial area 40)             | -0.89 |
| precuneus, part 1 (medial area 7)                                                                                                              | -0.53 | precuneus, part 1 (medial area 7)                                   | -0.63 |
| precuneus, part 2 (medial area 5)                                                                                                              | -0.94 | precuneus, part 2 (medial area 5)                                   | -0.87 |
| precuneus, part 3 (dorsomedial parietooccipital sulcus)                                                                                        | -0.65 | precuneus, part 3 (dorsomedial parietooccipital sulcus)             | 0.61  |
| precuneus, part 4 (area 31)                                                                                                                    | 0.98  | precuneus, part 4 (area 31)                                         | 0.98  |
| postcentral gyrus, part 1 (area 1/2/3 upper limb)                                                                                              | -0.93 | postcentral gyrus, part 1 (area 1/2/3 upper limb)                   | -0.54 |
| postcentral gyrus, part 2 (area 1/2/3 tongue and larynx)                                                                                       | -0.93 | postcentral gyrus, part 2 (area 1/2/3 tongue and larynx)            | -0.94 |
| postcentral gyrus, part 3 (area 2)                                                                                                             | -0.92 | postcentral gyrus, part 3 (area 2)                                  | -0.69 |
| postcentral gyrus, part 4 (area 1/2/3 trunk)                                                                                                   | -0.94 | postcentral gyrus, part 4 (area 1/2/3 trunk)                        | -0.89 |
| insular, part 1 (hypergranular insula)                                                                                                         | -0.87 | insular, part 1 (hypergranular insula)                              | -0.86 |
| insular, part 2 (ventral agranular insula)                                                                                                     | 0.82  | insular, part 2 (ventral agranular insula)                          | 0.82  |
| insular, part 3 (dorsal agranular insula)                                                                                                      | 0.79  | insular, part 3 (dorsal agranular insula)                           | 0.09  |
| insular, part 4 (ventral granular insula)                                                                                                      | -0.82 | insular, part 4 (ventral granular insula)                           | -0.57 |
| insular, part 5 (dorsal granular insula)                                                                                                       | -0.92 | insular, part 5 (dorsal granular insula)                            | -0.88 |
| insular, part 6 (dorsal dysgranular insula)                                                                                                    | -0.75 | insular, part 6 (dorsal dysgranular insula)                         | -0.71 |
| cingulate gyrus, part 1 (dorsal area 23)                                                                                                       | 0.94  | cingulate gyrus, part 1 (dorsal area 23)                            | 0.93  |
| cingulate gyrus, part 2 (rostromedial area 24)                                                                                                 | 0.52  | cingulate gyrus, part 2 (rostromedial area 24)                      | 0.94  |
| cingulate gyrus, part 3 (pregenual area 32)                                                                                                    | 0.87  | cingulate gyrus, part 3 (pregenual area 32)                         | 0.42  |
| cingulate gyrus, part 4 (ventral area 23)                                                                                                      | 0.57  | cingulate gyrus, part 4 (ventral area 23)                           | 0.84  |
| cingulate gyrus, part 5 (caudodorsal area 24)                                                                                                  | -0.54 | cingulate gyrus, part 5 (caudodorsal area 24)                       | 0.18  |
| cingulate gyrus, part 6 (caudal area 24)                                                                                                       | -0.85 | cingulate gyrus, part 6 (caudal area 24)                            | -0.93 |
| cingulate gyrus, part 7 (subgenual area 32)                                                                                                    | 0.99  | cingulate gyrus, part 7 (subgenual area 32)                         | 0.98  |
| cuneus, part 1 (caudal lingual gyrus)                                                                                                          | 0.99  | cuneus, part 1 (caudal lingual gyrus)                               | 0.97  |
| cuneus, part 2 (rostral cuneus gyrus)                                                                                                          | 0.69  | cuneus, part 2 (rostral cuneus gyrus)                               | 0.34  |
| cuneus, part 3 (caudal cuneus gyrus)                                                                                                           | 0.98  | cuneus, part 3 (caudal cuneus gyrus)                                | 0.84  |
| cuneus, part 4 (rostral lingual gyrus)                                                                                                         | 0.90  | cuneus, part 4 (rostral lingual gyrus)                              | 0.54  |
| cuneus, part 5 (ventromedial parietooccipital sulcus)                                                                                          | 0.03  | cuneus, part 5 (ventromedial parietooccipital sulcus)               | -0.73 |
| occipital gyrus, part 1 (middle occipital gyrus)                                                                                               | 0.97  | occipital gyrus, part 1 (middle occipital gyrus)                    | 0.95  |
| occipital gyrus, part 2 (area V5/MT)                                                                                                           | 0.91  | occipital gyrus, part 2 (area V5/MT)                                | 0.94  |
| occipital gyrus, part 3 (occipital polar cortex)                                                                                               | 0.80  | occipital gyrus, part 3 (occipital polar cortex)                    | 1.00  |
| occipital gyrus, part 4 (inferior occipital gyrus)                                                                                             | 0.92  | occipital gyrus, part 4 (inferior occipital gyrus)                  | 0.97  |
| superior occipital gyrus, part 1 (medial superior occipital gyrus)                                                                             | 0.35  | superior occipital gyrus, part 1 (medial superior occipital gyrus)  | 0.59  |
| superior occipital gyrus, part 2 (lateral superior occipital gyrus)                                                                            | 0.83  | superior occipital gyrus, part 2 (lateral superior occipital gyrus) | 0.61  |
| amygdala, part 1 (medial amygdala)                                                                                                             | 0.65  | amygdala, part 1 (medial amygdala)                                  | 0.81  |
| amygdala, part 2 (lateral amygdala)                                                                                                            | 0.07  | amygdala, part 2 (lateral amygdala)                                 | 0.72  |

| Resting-State                                                                                                                                  |        |                                                |                        |                         |       |
|------------------------------------------------------------------------------------------------------------------------------------------------|--------|------------------------------------------------|------------------------|-------------------------|-------|
| DMN and TPN regions in the Brainnetome ROI atlas from Fan et al. 2016 and their correlation between the resting-state and task-performing QPPs |        |                                                |                        |                         |       |
| Left Hemisphere                                                                                                                                |        | Right Hemisphere                               |                        |                         |       |
| hippocampus, part 1 (rostral hipp)                                                                                                             | 0.58   | hippocampus, part 1 (rostral hipp)             |                        | 0.84                    |       |
| hippocampus, part 2 (caudal hipp)                                                                                                              | 0.57   | hippocampus, part 2 (caudal hipp)              |                        | 0.94                    |       |
| striatum, part 1 (ventral caudate)                                                                                                             | 0.91   | striatum, part 1 (ventral caudate)             |                        | -0.92                   |       |
| striatum, part 2 (globus pallidus)                                                                                                             | 0.35   | striatum, part 2 (globus pallidus)             |                        | -0.74                   |       |
| striatum, part 3 (nucleus accumbens)                                                                                                           | 0.98   | striatum, part 3 (nucleus accumbens)           |                        | 0.54                    |       |
| striatum, part 4 (ventromedial putamen)                                                                                                        | 0.50   | striatum, part 4 (ventromedial putamen)        |                        | -0.88                   |       |
| striatum, part 5 (dorsal caudate)                                                                                                              | 0.99   | striatum, part 5 (dorsal caudate)              |                        | -0.16                   |       |
| striatum, part 6 (dorsolateral putamen)                                                                                                        | -0.89  | striatum, part 6 (dorsolateral putamen)        |                        | -0.63                   |       |
| thalamus, part 1 (medial prefrontal thalamus)                                                                                                  | 0.88   | thalamus, part 1 (medial prefrontal thalamus)  |                        | 0.22                    |       |
| thalamus, part 2 (medial premotor thalamus)                                                                                                    | 0.98   | thalamus, part 2 (medial premotor thalamus)    |                        | 0.87                    |       |
| thalamus, part 3 (sensory thalamus)                                                                                                            | 0.93   | thalamus, part 3 (sensory thalamus)            |                        | 0.84                    |       |
| thalamus, part 4 (rostral temporal thalamus)                                                                                                   | 0.90   | thalamus, part 4 (rostral temporal thalamus)   |                        | 0.69                    |       |
| thalamus, part 5 (posterior parietal thalamus)                                                                                                 | 0.99   | thalamus, part 5 (posterior parietal thalamus) |                        | 0.96                    |       |
| thalamus, part 6 (occipital thalamus)                                                                                                          | 0.94   | thalamus, part 6 (occipital thalamus)          |                        | 0.93                    |       |
| thalamus, part 7 (caudal temporal thalamus)                                                                                                    | 0.97   | thalamus, part 7 (caudal temporal thalamus)    |                        | 0.83                    |       |
| thalamus, part 8 (lateral prefrontal thalamus)                                                                                                 | 0.93   | thalamus, part 8 (lateral prefrontal thalamus) |                        | 0.92                    |       |
| Left                                                                                                                                           | Vermis | Right                                          |                        |                         |       |
| Cerebellar lobule I-IV                                                                                                                         | 0.08   |                                                | Cerebellar lobule I-IV | 0.78                    |       |
| Cerebellar lobule V                                                                                                                            | 0.98   |                                                | Cerebellar lobule V    | 0.65                    |       |
| Cerebellar lobule VI                                                                                                                           | 0.98   | Cerebellar lobule VI                           | 0.84                   | Cerebellar lobule VI    | 0.99  |
| Cerebellar Crus I                                                                                                                              | -0.70  |                                                | Cerebellar Crus I      | -0.42                   |       |
| Cerebellar Crus II                                                                                                                             | -0.88  | Cerebellar Crus II                             | -0.66                  | Cerebellar Crus II      | -0.92 |
| Cerebellar lobule VIIb                                                                                                                         | -0.77  | Cerebellar lobule VIIb                         | 0.26                   | Cerebellar lobule VIIb  | -0.84 |
| Cerebellar lobule VIIla                                                                                                                        | -0.13  | Cerebellar lobule VIIla                        | -0.01                  | Cerebellar lobule VIIla | 0.19  |
| Cerebellar lobule VIIlb                                                                                                                        | -0.64  | Cerebellar lobule VIIlb                        | -0.57                  | Cerebellar lobule VIIlb | -0.97 |
| Cerebellar lobule IX                                                                                                                           | -0.38  | Cerebellar lobule IX                           | -0.97                  | Cerebellar lobule IX    | -0.93 |
| Cerebellar lobule X                                                                                                                            | -0.96  | Cerebellar lobule X                            | -0.97                  | Cerebellar lobule X     | -0.98 |

| Task-Performing                                                                                                                                |        |                                                |                        |                         |       |
|------------------------------------------------------------------------------------------------------------------------------------------------|--------|------------------------------------------------|------------------------|-------------------------|-------|
| DMN and TPN regions in the Brainnetome ROI atlas from Fan et al. 2016 and their correlation between the resting-state and task-performing QPPs |        |                                                |                        |                         |       |
| Left Hemisphere                                                                                                                                |        | Right Hemisphere                               |                        |                         |       |
| hippocampus, part 1 (rostral hipp)                                                                                                             | 0.58   | hippocampus, part 1 (rostral hipp)             |                        | 0.84                    |       |
| hippocampus, part 2 (caudal hipp)                                                                                                              | 0.57   | hippocampus, part 2 (caudal hipp)              |                        | 0.94                    |       |
| striatum, part 1 (ventral caudate)                                                                                                             | 0.91   | striatum, part 1 (ventral caudate)             |                        | -0.92                   |       |
| striatum, part 2 (globus pallidus)                                                                                                             | 0.35   | striatum, part 2 (globus pallidus)             |                        | -0.74                   |       |
| striatum, part 3 (nucleus accumbens)                                                                                                           | 0.98   | striatum, part 3 (nucleus accumbens)           |                        | 0.54                    |       |
| striatum, part 4 (ventromedial putamen)                                                                                                        | 0.50   | striatum, part 4 (ventromedial putamen)        |                        | -0.88                   |       |
| striatum, part 5 (dorsal caudate)                                                                                                              | 0.99   | striatum, part 5 (dorsal caudate)              |                        | -0.16                   |       |
| striatum, part 6 (dorsolateral putamen)                                                                                                        | -0.89  | striatum, part 6 (dorsolateral putamen)        |                        | -0.63                   |       |
| thalamus, part 1 (medial prefrontal thalamus)                                                                                                  | 0.88   | thalamus, part 1 (medial prefrontal thalamus)  |                        | 0.22                    |       |
| thalamus, part 2 (medial premotor thalamus)                                                                                                    | 0.98   | thalamus, part 2 (medial premotor thalamus)    |                        | 0.87                    |       |
| thalamus, part 3 (sensory thalamus)                                                                                                            | 0.93   | thalamus, part 3 (sensory thalamus)            |                        | 0.84                    |       |
| thalamus, part 4 (rostral temporal thalamus)                                                                                                   | 0.90   | thalamus, part 4 (rostral temporal thalamus)   |                        | 0.69                    |       |
| thalamus, part 5 (posterior parietal thalamus)                                                                                                 | 0.99   | thalamus, part 5 (posterior parietal thalamus) |                        | 0.96                    |       |
| thalamus, part 6 (occipital thalamus)                                                                                                          | 0.94   | thalamus, part 6 (occipital thalamus)          |                        | 0.93                    |       |
| thalamus, part 7 (caudal temporal thalamus)                                                                                                    | 0.97   | thalamus, part 7 (caudal temporal thalamus)    |                        | 0.83                    |       |
| thalamus, part 8 (lateral prefrontal thalamus)                                                                                                 | 0.93   | thalamus, part 8 (lateral prefrontal thalamus) |                        | 0.92                    |       |
| Left                                                                                                                                           | Vermis | Right                                          |                        |                         |       |
| Cerebellar lobule I-IV                                                                                                                         | 0.08   |                                                | Cerebellar lobule I-IV | 0.78                    |       |
| Cerebellar lobule V                                                                                                                            | 0.98   |                                                | Cerebellar lobule V    | 0.65                    |       |
| Cerebellar lobule VI                                                                                                                           | 0.98   | Cerebellar lobule VI                           | 0.84                   | Cerebellar lobule VI    | 0.99  |
| Cerebellar Crus I                                                                                                                              | -0.70  |                                                | Cerebellar Crus I      | -0.42                   |       |
| Cerebellar Crus II                                                                                                                             | -0.88  | Cerebellar Crus II                             | -0.66                  | Cerebellar Crus II      | -0.92 |
| Cerebellar lobule VIIb                                                                                                                         | -0.77  | Cerebellar lobule VIIb                         | 0.26                   | Cerebellar lobule VIIb  | -0.84 |
| Cerebellar lobule VIIla                                                                                                                        | -0.13  | Cerebellar lobule VIIla                        | -0.01                  | Cerebellar lobule VIIla | 0.19  |
| Cerebellar lobule VIIlb                                                                                                                        | -0.64  | Cerebellar lobule VIIlb                        | -0.57                  | Cerebellar lobule VIIlb | -0.97 |
| Cerebellar lobule IX                                                                                                                           | -0.38  | Cerebellar lobule IX                           | -0.97                  | Cerebellar lobule IX    | -0.93 |
| Cerebellar lobule X                                                                                                                            | -0.96  | Cerebellar lobule X                            | -0.97                  | Cerebellar lobule X     | -0.98 |

**Supplementary Table 1.** All regions of interest included in the Brainnetome ROI atlas from Fan et al. (2016). All regions of interest that included voxels that were part of the DMN are in blue. All regions of interest that included voxels that were part of the TPN are in blue. Regions of interest that had voxels from both the DMN and TPN are shown in purple. The table on the left shows the results of DMN and TPN masks from the resting-state group, while the table on the right shows the results of DMN and TPN masks from the task-performing group. The value next to the ROI names are correlation values for the Pearson correlation between the timecourse of the ROI from the resting-state QPP versus the timecourse of the ROI from the task-performing QPP. High correlation values show that the region behaved similarly in the resting-state QPP and task-performing QPP. Low correlation values show that the region behaved differently in the resting-state QPP and task-performing QPP.
